# Supplementary material for: Overall Dietary Quality Relates to Gut Microbiota Diversity and Abundance
Source: PubMed Central journal article supplement (PMC6515207; doi:10.3390/ijms20081835), 2019-04-13
Supplement: ijms-20-01835-s001.pdf [file ijms-20-01835-s001.pdf]

Table S1

IDQ Q1, n=25

IDQ Q4, n=21

|                                                                                                                     | IQR 25 |             | IQR 75      |        | IQR 25      |             | IQR 75 |             | % difference between median of obese and overweight women |             |              |  | P-value, Mann Whitney U test |      | BH-adjusted P-value |  |
|---------------------------------------------------------------------------------------------------------------------|--------|-------------|-------------|--------|-------------|-------------|--------|-------------|-----------------------------------------------------------|-------------|--------------|--|------------------------------|------|---------------------|--|
|                                                                                                                     | median | percentiles | percentiles | median | percentiles | percentiles | median | percentiles | median difference                                         | 95%CI lower | 95%CI higher |  |                              |      |                     |  |
| k__Bacteria;p__Actinobacteria                                                                                       | 0,65   |             | 0,31        | 1,13   | 0,86        | 0,37        | 2,26   | 25,2        | 0,22                                                      | -0,009      | 0,001        |  |                              | 0,16 | 0,39                |  |
| k__Bacteria;p__Bacteroidetes                                                                                        | 52,23  | 45,03       | 64,65       | 44,01  | 38,09       | 56,03       | 56,03  | -18,7       | -8,22                                                     | 0,006       | 0,148        |  |                              | 0,03 | 0,09                |  |
| k__Bacteria;p__Firmicutes                                                                                           | 42,22  | 33,07       | 49,91       | 47,97  | 39,09       | 56,60       | 56,60  | 12,0        | 5,75                                                      | -0,157      | -0,007       |  |                              | 0,03 | 0,09                |  |
| k__Bacteria;p__Proteobacteria                                                                                       | 2,96   | 1,60        | 4,62        | 1,68   | 0,82        | 3,31        | 3,31   | -76,6       | -1,28                                                     | 0           | 0,021        |  |                              | 0,07 | 0,18                |  |
| k__Bacteria;p__Bacteroidetes;c__Bacteroidia                                                                         | 52,23  | 45,03       | 64,65       | 44,01  | 38,09       | 56,03       | 56,03  | -18,7       | -8,22                                                     | 0,006       | 0,148        |  |                              | 0,03 | 0,09                |  |
| k__Bacteria;p__Firmicutes;c__Clostridia                                                                             | 39,35  | 32,51       | 49,30       | 47,52  | 38,39       | 55,62       | 55,62  | 17,2        | 8,17                                                      | -0,15       | -0,005       |  |                              | 0,03 | 0,09                |  |
| k__Bacteria;p__Proteobacteria;c__Betaproteobacteria                                                                 | 1,64   | 0,75        | 3,51        | 0,74   | 0,22        | 1,43        | 1,43   | -122,6      | -0,91                                                     | 0,002       | 0,017        |  |                              | 0,01 | 0,07                |  |
| k__Bacteria;p__Bacteroidetes;c__Bacteroidia;o__Bacteroidales                                                        | 52,23  | 45,03       | 64,65       | 44,01  | 38,09       | 56,03       | 56,03  | -18,7       | -8,22                                                     | 0,006       | 0,148        |  |                              | 0,03 | 0,09                |  |
| k__Bacteria;p__Firmicutes;c__Clostridia;o__Clostridiales                                                            | 39,22  | 32,51       | 49,29       | 47,47  | 38,36       | 55,57       | 55,57  | 17,4        | 8,24                                                      | -0,015      | -0,006       |  |                              | 0,03 | 0,09                |  |
| k__Bacteria;p__Proteobacteria;c__Betaproteobacteria;o__Burkholderiales                                              | 1,64   | 0,75        | 3,51        | 0,74   | 0,22        | 1,43        | 1,43   | -122,6      | -0,91                                                     | 0,002       | 0,017        |  |                              | 0,01 | 0,07                |  |
| k__Bacteria;p__Bacteroidetes;c__Bacteroidia;o__Bacteroidales;f__Bacteroidaceae                                      | 29,92  | 24,19       | 43,48       | 29,82  | 18,39       | 37,29       | 37,29  | -0,3        | -0,10                                                     | -0,049      | 0,107        |  |                              | 0,28 | 0,53                |  |
| k__Bacteria;p__Bacteroidetes;c__Bacteroidia;o__Bacteroidales;f__Porphyromonadaceae                                  | 3,83   | 2,21        | 5,17        | 3,32   | 2,20        | 5,56        | 5,56   | -15,4       | -0,51                                                     | -0,013      | 0,014        |  |                              | 0,85 | 0,92                |  |
| k__Bacteria;p__Bacteroidetes;c__Bacteroidia;o__Bacteroidales;f__Prevotellaceae                                      | 0,00   | 0,00        | 7,68        | 0,01   | 0,00        | 0,01        | 0,01   | 16,6        | 0,00                                                      | 0           | 0            |  |                              | 0,51 | 0,66                |  |
| k__Bacteria;p__Bacteroidetes;c__Bacteroidia;o__Bacteroidales;f__Rikenellaceae                                       | 4,85   | 2,69        | 9,92        | 4,53   | 3,53        | 6,37        | 6,37   | -7,1        | -0,32                                                     | -0,013      | 0,032        |  |                              | 0,53 | 0,66                |  |
| k__Bacteria;p__Bacteroidetes;c__Bacteroidia;o__Bacteroidales;f__[Barnesiellaceae]                                   | 0,43   | 0,00        | 2,14        | 2,60   | 1,58        | 4,03        | 4,03   | 83,7        | 2,18                                                      | -0,026      | -0,003       |  |                              | 0,01 | 0,07                |  |
| k__Bacteria;p__Firmicutes;c__Clostridia;o__Clostridiales;f__                                                        | 2,87   | 1,70        | 4,47        | 6,06   | 2,64        | 10,16       | 10,16  | 52,7        | 3,19                                                      | -0,046      | 0            |  |                              | 0,02 | 0,09                |  |
| k__Bacteria;p__Firmicutes;c__Clostridia;o__Clostridiales;f__Lachnospiraceae                                         | 13,98  | 11,04       | 18,67       | 17,51  | 12,34       | 20,48       | 20,48  | 20,2        | 3,53                                                      | -0,049      | 0,014        |  |                              | 0,32 | 0,53                |  |
| k__Bacteria;p__Firmicutes;c__Clostridia;o__Clostridiales;f__Ruminococcaceae                                         | 18,51  | 10,56       | 21,69       | 20,05  | 15,21       | 27,79       | 27,79  | 7,7         | 1,54                                                      | -0,087      | 0,013        |  |                              | 0,18 | 0,40                |  |
| k__Bacteria;p__Firmicutes;c__Clostridia;o__Clostridiales;f__Veillonellaceae                                         | 1,01   | 0,62        | 2,13        | 0,89   | 0,55        | 1,44        | 1,44   | -13,7       | -0,12                                                     | -0,003      | 0,007        |  |                              | 0,52 | 0,66                |  |
| k__Bacteria;p__Proteobacteria;c__Betaproteobacteria;o__Burkholderiales;f__Alcaligenaceae                            | 1,64   | 0,75        | 3,51        | 0,74   | 0,22        | 1,43        | 1,43   | -122,6      | -0,91                                                     | 0,002       | 0,017        |  |                              | 0,01 | 0,07                |  |
| k__Bacteria;p__Bacteroidetes;c__Bacteroidia;o__Bacteroidales;f__Bacteroidaceae;g__Bacteroides                       | 29,92  | 24,19       | 43,48       | 29,82  | 18,39       | 37,29       | 37,29  | -0,3        | -0,10                                                     | -0,049      | 0,107        |  |                              | 0,28 | 0,53                |  |
| k__Bacteria;p__Bacteroidetes;c__Bacteroidia;o__Bacteroidales;f__Porphyromonadaceae;g__Parabacteroides               | 3,83   | 2,21        | 5,17        | 3,31   | 2,20        | 5,37        | 5,37   | -15,5       | -0,51                                                     | -0,012      | 0,015        |  |                              | 0,77 | 0,90                |  |
| k__Bacteria;p__Bacteroidetes;c__Bacteroidia;o__Bacteroidales;f__Prevotellaceae;g__Prevotella                        | 0,00   | 0,00        | 7,68        | 0,01   | 0,00        | 0,01        | 0,01   | 16,6        | 0,00                                                      | 0           | 0            |  |                              | 0,51 | 0,66                |  |
| k__Bacteria;p__Bacteroidetes;c__Bacteroidia;o__Bacteroidales;f__Rikenellaceae;g__                                   | 4,84   | 2,69        | 9,91        | 4,45   | 3,53        | 6,37        | 6,37   | -8,6        | -0,38                                                     | -0,013      | 0,033        |  |                              | 0,52 | 0,66                |  |
| k__Bacteria;p__Bacteroidetes;c__Bacteroidia;o__Bacteroidales;f__[Barnesiellaceae];g__                               | 0,43   | 0,00        | 2,14        | 2,60   | 1,58        | 4,03        | 4,03   | 83,7        | 2,18                                                      | -0,025      | -0,003       |  |                              | 0,01 | 0,07                |  |
| k__Bacteria;p__Firmicutes;c__Clostridia;o__Clostridiales;f__g__                                                     | 2,87   | 1,70        | 4,47        | 6,06   | 2,64        | 10,16       | 10,16  | 52,7        | 3,19                                                      | -0,046      | 0            |  |                              | 0,02 | 0,09                |  |
| k__Bacteria;p__Firmicutes;c__Clostridia;o__Clostridiales;f__Lachnospiraceae;g__                                     | 7,34   | 5,51        | 11,67       | 8,12   | 5,62        | 10,47       | 10,47  | 9,6         | 0,78                                                      | -0,021      | 0,027        |  |                              | 0,92 | 0,92                |  |
| k__Bacteria;p__Firmicutes;c__Clostridia;o__Clostridiales;f__Lachnospiraceae;g__Blautia                              | 1,49   | 1,27        | 2,09        | 1,81   | 1,06        | 2,76        | 2,76   | 17,6        | 0,32                                                      | -0,01       | 0,003        |  |                              | 0,47 | 0,66                |  |
| k__Bacteria;p__Firmicutes;c__Clostridia;o__Clostridiales;f__Lachnospiraceae;g__Coproccoccus                         | 0,75   | 0,36        | 1,25        | 1,76   | 0,64        | 3,63        | 3,63   | 57,3        | 1,01                                                      | -0,018      | -0,002       |  |                              | 0,01 | 0,09                |  |
| k__Bacteria;p__Firmicutes;c__Clostridia;o__Clostridiales;f__Lachnospiraceae;g__Lachnospira                          | 1,24   | 0,52        | 3,16        | 1,39   | 0,63        | 3,19        | 3,19   | 10,7        | 0,15                                                      | -0,01       | 0,007        |  |                              | 0,73 | 0,88                |  |
| k__Bacteria;p__Firmicutes;c__Clostridia;o__Clostridiales;f__Ruminococcaceae;g__                                     | 7,79   | 2,40        | 11,26       | 9,53   | 6,77        | 14,21       | 14,21  | 18,3        | 1,74                                                      | -0,061      | 0,013        |  |                              | 0,32 | 0,53                |  |
| k__Bacteria;p__Firmicutes;c__Clostridia;o__Clostridiales;f__Ruminococcaceae;g__Faecalibacterium                     | 4,18   | 2,50        | 6,05        | 5,62   | 3,66        | 8,26        | 8,26   | 25,6        | 1,44                                                      | -0,032      | 0,003        |  |                              | 0,07 | 0,18                |  |
| k__Bacteria;p__Firmicutes;c__Clostridia;o__Clostridiales;f__Ruminococcaceae;g__Oscillospira                         | 0,90   | 0,53        | 1,72        | 1,24   | 0,89        | 1,59        | 1,59   | 27,4        | 0,34                                                      | -0,006      | 0,002        |  |                              | 0,32 | 0,53                |  |
| k__Bacteria;p__Firmicutes;c__Clostridia;o__Clostridiales;f__Ruminococcaceae;g__Ruminococcus                         | 2,85   | 0,96        | 4,45        | 2,46   | 0,80        | 5,11        | 5,11   | -15,7       | -0,39                                                     | -0,016      | 0,012        |  |                              | 0,90 | 0,92                |  |
| k__Bacteria;p__Proteobacteria;c__Betaproteobacteria;o__Burkholderiales;f__Alcaligenaceae;g__Sutterella              | 1,33   | 0,70        | 3,51        | 0,61   | 0,19        | 1,40        | 1,40   | -118,6      | -0,72                                                     | 0,002       | 0,018        |  |                              | 0,01 | 0,07                |  |
| k__Bacteria;p__Bacteroidetes;c__Bacteroidia;o__Bacteroidales;f__Bacteroidaceae;g__Bacteroides;s__                   | 19,22  | 13,25       | 31,78       | 17,14  | 11,87       | 24,66       | 24,66  | -12,1       | -2,08                                                     | -0,038      | 0,104        |  |                              | 0,41 | 0,62                |  |
| k__Bacteria;p__Bacteroidetes;c__Bacteroidia;o__Bacteroidales;f__Bacteroidaceae;g__Bacteroides;s__cacciae            | 0,82   | 0,09        | 1,90        | 1,00   | 0,36        | 2,78        | 2,78   | 17,5        | 0,17                                                      | -0,01       | 0,003        |  |                              | 0,37 | 0,60                |  |
| k__Bacteria;p__Bacteroidetes;c__Bacteroidia;o__Bacteroidales;f__Bacteroidaceae;g__Bacteroides;s__fragilis           | 0,27   | 0,00        | 0,85        | 0,57   | 0,02        | 1,71        | 1,71   | 53,0        | 0,30                                                      | -0,006      | 0,001        |  |                              | 0,27 | 0,53                |  |
| k__Bacteria;p__Bacteroidetes;c__Bacteroidia;o__Bacteroidales;f__Bacteroidaceae;g__Bacteroides;s__ovatus             | 1,43   | 0,77        | 2,49        | 1,10   | 0,72        | 2,77        | 2,77   | -30,1       | -0,33                                                     | -0,008      | 0,007        |  |                              | 0,87 | 0,92                |  |
| k__Bacteria;p__Bacteroidetes;c__Bacteroidia;o__Bacteroidales;f__Bacteroidaceae;g__Bacteroides;s__uniformis          | 3,72   | 1,21        | 7,85        | 3,74   | 1,67        | 7,48        | 7,48   | 0,6         | 0,02                                                      | -0,022      | 0,02         |  |                              | 0,83 | 0,92                |  |
| k__Bacteria;p__Bacteroidetes;c__Bacteroidia;o__Bacteroidales;f__Porphyromonadaceae;g__Parabacteroides;s__           | 2,28   | 0,50        | 4,66        | 1,85   | 0,69        | 3,82        | 3,82   | -23,3       | -0,43                                                     | -0,008      | 0,019        |  |                              | 0,40 | 0,62                |  |
| k__Bacteria;p__Bacteroidetes;c__Bacteroidia;o__Bacteroidales;f__Porphyromonadaceae;g__Parabacteroides;s__distasonis | 0,90   | 0,00        | 1,86        | 1,25   | 0,46        | 2,56        | 2,56   | 28,0        | 0,35                                                      | -0,012      | 0,002        |  |                              | 0,15 | 0,37                |  |
| k__Bacteria;p__Bacteroidetes;c__Bacteroidia;o__Bacteroidales;f__Prevotellaceae;g__Prevotella;s__copri               | 0,00   | 0,00        | 0,01        | 0,01   | 0,00        | 0,01        | 0,01   | 22,7        | 0,00                                                      | 0           | 0            |  |                              | 0,28 | 0,53                |  |
| k__Bacteria;p__Bacteroidetes;c__Bacteroidia;o__Bacteroidales;f__Rikenellaceae;g__s__                                | 4,84   | 2,69        | 9,91        | 4,45   | 3,53        | 6,37        | 6,37   | -8,6        | -0,38                                                     | -0,013      | 0,033        |  |                              | 0,52 | 0,66                |  |
| k__Bacteria;p__Bacteroidetes;c__Bacteroidia;o__Bacteroidales;f__[Barnesiellaceae];g__s__                            | 0,43   | 0,00        | 2,14        | 2,60   | 1,58        | 4,03        | 4,03   | 83,7        | 2,18                                                      | -0,026      | -0,003       |  |                              | 0,01 | 0,07                |  |
| k__Bacteria;p__Firmicutes;c__Clostridia;o__Clostridiales;f__g__s__                                                  | 2,87   | 1,70        | 4,47        | 6,06   | 2,64        | 10,16       | 10,16  | 52,7        | 3,19                                                      | -0,046      | 0            |  |                              | 0,02 | 0,09                |  |
| k__Bacteria;p__Firmicutes;c__Clostridia;o__Clostridiales;f__Lachnospiraceae;g__s__                                  | 7,34   | 5,51        | 11,67       | 8,12   | 5,62        | 10,47       | 10,47  | 9,6         | 0,78                                                      | -0,021      | 0,027        |  |                              | 0,92 | 0,92                |  |
| k__Bacteria;p__Firmicutes;c__Clostridia;o__Clostridiales;f__Lachnospiraceae;g__Blautia;s__                          | 1,49   | 1,27        | 2,09        | 1,81   | 1,06        | 2,76        | 2,76   | 17,7        | 0,32                                                      | -0,01       | 0,003        |  |                              | 0,50 | 0,66                |  |
| k__Bacteria;p__Firmicutes;c__Clostridia;o__Clostridiales;f__Lachnospiraceae;g__Coproccoccus;s__                     | 0,69   | 0,29        | 1,18        | 0,61   | 0,39        | 1,43        | 1,43   | -12,7       | -0,08                                                     | -0,005      | 0,002        |  |                              | 0,82 | 0,92                |  |
| k__Bacteria;p__Firmicutes;c__Clostridia;o__Clostridiales;f__Lachnospiraceae;g__Lachnospira;s__                      | 1,24   | 0,52        | 3,16        | 1,39   | 0,63        | 3,19        | 3,19   | 10,7        | 0,15                                                      | -0,01       | 0,007        |  |                              | 0,73 | 0,88                |  |
| k__Bacteria;p__Firmicutes;c__Clostridia;o__Clostridiales;f__Ruminococcaceae;g__s__                                  | 7,79   | 2,40        | 11,26       | 9,53   | 6,77        | 14,21       | 14,21  | 18,3        | 1,74                                                      | -0,061      | 0,013        |  |                              | 0,32 | 0,53                |  |
| k__Bacteria;p__Firmicutes;c__Clostridia;o__Clostridiales;f__Ruminococcaceae;g__Faecalibacterium;s__prausnitzii      | 4,18   | 2,50        | 6,05        | 5,62   | 3,66        | 8,26        | 8,26   | 25,6        | 1,44                                                      | -0,032      | 0,003        |  |                              | 0,07 | 0,18                |  |
| k__Bacteria;p__Firmicutes;c__Clostridia;o__Clostridiales;f__Ruminococcaceae;g__Oscillospira;s__                     | 0,90   | 0,53        | 1,72        | 1,24   | 0,89        | 1,59        | 1,59   | 27,4        | 0,34                                                      | -0,006      | 0,002        |  |                              | 0,32 | 0,53                |  |
| k__Bacteria;p__Firmicutes;c__Clostridia;o__Clostridiales;f__Ruminococcaceae;g__Ruminococcus;s__                     | 2,85   | 0,96        | 4,45        | 2,46   | 0,80        | 5,11        | 5,11   | -15,7       | -0,39                                                     | -0,016      | 0,012        |  |                              | 0,90 | 0,92                |  |
| k__Bacteria;p__Proteobacteria;c__Betaproteobacteria;o__Burkholderiales;f__Alcaligenaceae;g__Sutterella;s__          | 1,33   | 0,70        | 3,51        | 0,61   | 0,19        | 1,40        | 1,40   | -118,6      | -0,72                                                     | 0,002       | 0,018        |  |                              | 0,01 | 0,07                |  |

Table S2

|                                                                                                                      | poor dietary quality, n=43 |                       |                       | good dietary quality, n=41 |                       |                       | P-value<br>Mann<br>Whitney<br>U test | BH-<br>adjusted P-<br>value |
|----------------------------------------------------------------------------------------------------------------------|----------------------------|-----------------------|-----------------------|----------------------------|-----------------------|-----------------------|--------------------------------------|-----------------------------|
|                                                                                                                      | median                     | IQR 25<br>percentiles | IQR 75<br>percentiles | median                     | IQR 25<br>percentiles | IQR 75<br>percentiles |                                      |                             |
| k__Bacteria;p__Actinobacteria                                                                                        | 0,65                       | 0,34                  | 1,58                  | 0,79                       | 0,35                  | 1,71                  | 0,582                                | 0,73                        |
| k__Bacteria;p__Bacteroidetes                                                                                         | 50,76                      | 44,72                 | 59,07                 | 48,44                      | 39,86                 | 56,06                 | 0,167                                | 0,44                        |
| k__Bacteria;p__Firmicutes                                                                                            | 42,99                      | 34,30                 | 48,86                 | 46,25                      | 38,16                 | 54,21                 | 0,116                                | 0,35                        |
| k__Bacteria;p__Proteobacteria                                                                                        | 2,96                       | 1,23                  | 4,43                  | 2,22                       | 1,34                  | 3,71                  | 0,205                                | 0,45                        |
| k__Bacteria;p__Bacteroidetes;c__Bacteroidia                                                                          | 50,76                      | 44,72                 | 59,07                 | 48,44                      | 39,86                 | 56,06                 | 0,167                                | 0,44                        |
| k__Bacteria;p__Firmicutes;c__Clostridia                                                                              | 42,64                      | 33,76                 | 48,02                 | 45,84                      | 37,53                 | 53,55                 | 0,093                                | 0,35                        |
| k__Bacteria;p__Proteobacteria;c__Betaproteobacteria                                                                  | 1,64                       | 0,79                  | 2,81                  | 1,09                       | 0,56                  | 1,89                  | 0,11                                 | 0,35                        |
| k__Bacteria;p__Bacteroidetes;c__Bacteroidia;o__Bacteroidales                                                         | 50,76                      | 44,72                 | 59,07                 | 48,44                      | 39,86                 | 56,06                 | 0,167                                | 0,44                        |
| k__Bacteria;p__Firmicutes;c__Clostridia;o__Clostridiales                                                             | 42,57                      | 33,76                 | 47,99                 | 45,64                      | 37,50                 | 53,46                 | 0,09                                 | 0,35                        |
| k__Bacteria;p__Proteobacteria;c__Betaproteobacteria;o__Burkholderiales                                               | 1,64                       | 0,79                  | 2,81                  | 1,09                       | 0,56                  | 1,89                  | 0,11                                 | 0,35                        |
| k__Bacteria;p__Bacteroidetes;c__Bacteroidia;o__Bacteroidales;f__Bacteroidaceae                                       | 33,01                      | 24,27                 | 42,56                 | 29,82                      | 20,24                 | 39,92                 | 0,19                                 | 0,44                        |
| k__Bacteria;p__Bacteroidetes;c__Bacteroidia;o__Bacteroidales;f__Porphyromonadaceae                                   | 2,87                       | 1,94                  | 4,69                  | 3,42                       | 2,37                  | 5,37                  | 0,327                                | 0,56                        |
| k__Bacteria;p__Bacteroidetes;c__Bacteroidia;o__Bacteroidales;f__Prevotellaceae                                       | 0,00                       | 0,00                  | 0,01                  | 0,01                       | 0,00                  | 0,01                  | 0,422                                | 0,60                        |
| k__Bacteria;p__Bacteroidetes;c__Bacteroidia;o__Bacteroidales;f__Rikenellaceae                                        | 6,32                       | 2,92                  | 9,28                  | 5,36                       | 3,67                  | 8,70                  | 0,876                                | 0,94                        |
| k__Bacteria;p__Bacteroidetes;c__Bacteroidia;o__Bacteroidales;f__[Barnesiellaceae]                                    | 0,47                       | 0,00                  | 2,48                  | 1,93                       | 0,01                  | 3,03                  | 0,094                                | 0,35                        |
| k__Bacteria;p__Firmicutes;c__Clostridia;o__Clostridiales;f__                                                         | 3,25                       | 1,90                  | 5,22                  | 4,21                       | 2,09                  | 7,10                  | 0,285                                | 0,52                        |
| k__Bacteria;p__Firmicutes;c__Clostridia;o__Clostridiales;f__Lachnospiraceae                                          | 15,45                      | 11,09                 | 19,45                 | 16,95                      | 13,04                 | 20,78                 | 0,558                                | 0,72                        |
| k__Bacteria;p__Firmicutes;c__Clostridia;o__Clostridiales;f__Ruminococcaceae                                          | 18,51                      | 13,11                 | 22,37                 | 20,71                      | 15,21                 | 26,53                 | 0,102                                | 0,35                        |
| k__Bacteria;p__Firmicutes;c__Clostridia;o__Clostridiales;f__Veillonellaceae                                          | 1,09                       | 0,59                  | 2,20                  | 1,16                       | 0,56                  | 2,46                  | 0,869                                | 0,94                        |
| k__Bacteria;p__Proteobacteria;c__Betaproteobacteria;o__Burkholderiales;f__Alcaligenaceae                             | 1,64                       | 0,79                  | 2,81                  | 1,09                       | 0,56                  | 1,89                  | 0,11                                 | 0,35                        |
| k__Bacteria;p__Bacteroidetes;c__Bacteroidia;o__Bacteroidales;f__Bacteroidaceae;g__Bacteroides                        | 33,01                      | 24,27                 | 42,56                 | 29,82                      | 20,24                 | 39,92                 | 0,19                                 | 0,44                        |
| k__Bacteria;p__Bacteroidetes;c__Bacteroidia;o__Bacteroidales;f__Porphyromonadaceae;g__Parabacteroides                | 2,87                       | 1,93                  | 4,69                  | 3,42                       | 2,36                  | 5,23                  | 0,35                                 | 0,56                        |
| k__Bacteria;p__Bacteroidetes;c__Bacteroidia;o__Bacteroidales;f__Prevotellaceae;g__Prevotella                         | 0,00                       | 0,00                  | 0,01                  | 0,01                       | 0,00                  | 0,01                  | 0,422                                | 0,60                        |
| k__Bacteria;p__Bacteroidetes;c__Bacteroidia;o__Bacteroidales;f__Rikenellaceae;g__                                    | 6,32                       | 2,92                  | 9,25                  | 5,36                       | 3,67                  | 8,70                  | 0,869                                | 0,94                        |
| k__Bacteria;p__Bacteroidetes;c__Bacteroidia;o__Bacteroidales;f__[Barnesiellaceae];g__                                | 0,47                       | 0,00                  | 2,48                  | 1,93                       | 0,01                  | 3,03                  | 0,094                                | 0,35                        |
| k__Bacteria;p__Firmicutes;c__Clostridia;o__Clostridiales;f__;g__                                                     | 3,25                       | 1,90                  | 5,22                  | 4,21                       | 2,09                  | 7,10                  | 0,285                                | 0,52                        |
| k__Bacteria;p__Firmicutes;c__Clostridia;o__Clostridiales;f__Lachnospiraceae;g__                                      | 8,57                       | 5,52                  | 12,18                 | 7,89                       | 5,54                  | 10,69                 | 0,564                                | 0,72                        |
| k__Bacteria;p__Firmicutes;c__Clostridia;o__Clostridiales;f__Lachnospiraceae;g__Blautia                               | 1,62                       | 1,25                  | 2,26                  | 1,75                       | 0,94                  | 2,58                  | 0,778                                | 0,93                        |
| k__Bacteria;p__Firmicutes;c__Clostridia;o__Clostridiales;f__Lachnospiraceae;g__Coprococcus                           | 0,75                       | 0,42                  | 1,46                  | 1,33                       | 0,62                  | 2,97                  | 0,015                                | 0,35                        |
| k__Bacteria;p__Firmicutes;c__Clostridia;o__Clostridiales;f__Lachnospiraceae;g__Lachnospira                           | 1,24                       | 0,53                  | 2,72                  | 1,69                       | 0,63                  | 3,27                  | 0,345                                | 0,56                        |
| k__Bacteria;p__Firmicutes;c__Clostridia;o__Clostridiales;f__Ruminococcaceae;g__                                      | 8,27                       | 2,68                  | 12,50                 | 9,53                       | 6,55                  | 14,21                 | 0,222                                | 0,45                        |
| k__Bacteria;p__Firmicutes;c__Clostridia;o__Clostridiales;f__Ruminococcaceae;g__Faecalibacterium                      | 4,71                       | 2,59                  | 6,47                  | 5,62                       | 3,88                  | 7,88                  | 0,038                                | 0,35                        |
| k__Bacteria;p__Firmicutes;c__Clostridia;o__Clostridiales;f__Ruminococcaceae;g__Oscillospira                          | 0,91                       | 0,73                  | 1,45                  | 1,24                       | 0,89                  | 1,52                  | 0,083                                | 0,35                        |
| k__Bacteria;p__Firmicutes;c__Clostridia;o__Clostridiales;f__Ruminococcaceae;g__Ruminococcus                          | 2,85                       | 0,98                  | 4,89                  | 2,43                       | 0,74                  | 3,92                  | 0,413                                | 0,60                        |
| k__Bacteria;p__Proteobacteria;c__Betaproteobacteria;o__Burkholderiales;f__Alcaligenaceae;g__Sutterella               | 1,37                       | 0,71                  | 2,81                  | 1,02                       | 0,51                  | 1,89                  | 0,106                                | 0,35                        |
| k__Bacteria;p__Bacteroidetes;c__Bacteroidia;o__Bacteroidales;f__Bacteroidaceae;g__Bacteroides;s__                    | 20,30                      | 12,67                 | 31,49                 | 18,25                      | 13,47                 | 26,17                 | 0,359                                | 0,56                        |
| k__Bacteria;p__Bacteroidetes;c__Bacteroidia;o__Bacteroidales;f__Bacteroidaceae;g__Bacteroides;s__caccae              | 0,83                       | 0,10                  | 1,77                  | 0,93                       | 0,34                  | 2,27                  | 0,466                                | 0,64                        |
| k__Bacteria;p__Bacteroidetes;c__Bacteroidia;o__Bacteroidales;f__Bacteroidaceae;g__Bacteroides;s__fragilis            | 0,47                       | 0,01                  | 1,42                  | 0,42                       | 0,03                  | 1,10                  | 0,993                                | 0,99                        |
| k__Bacteria;p__Bacteroidetes;c__Bacteroidia;o__Bacteroidales;f__Bacteroidaceae;g__Bacteroides;s__ovatus              | 1,50                       | 0,79                  | 2,59                  | 1,51                       | 0,82                  | 3,08                  | 0,897                                | 0,95                        |
| k__Bacteria;p__Bacteroidetes;c__Bacteroidia;o__Bacteroidales;f__Bacteroidaceae;g__Bacteroides;s__uniformis           | 3,72                       | 1,53                  | 8,34                  | 3,39                       | 1,89                  | 7,61                  | 0,982                                | 0,99                        |
| k__Bacteria;p__Bacteroidetes;c__Bacteroidia;o__Bacteroidales;f__Porphyromonadaceae;g__Parabacteroides;s__            | 1,48                       | 0,05                  | 3,70                  | 1,86                       | 0,69                  | 3,82                  | 0,989                                | 0,99                        |
| k__Bacteria;p__Bacteroidetes;c__Bacteroidia;o__Bacteroidales;f__Porphyromonadaceae;g__Parabacteroides;s__distansonis | 1,12                       | 0,00                  | 1,73                  | 1,22                       | 0,55                  | 2,22                  | 0,188                                | 0,44                        |
| k__Bacteria;p__Bacteroidetes;c__Bacteroidia;o__Bacteroidales;f__Prevotellaceae;g__Prevotella;s__copri                | 0,00                       | 0,00                  | 0,01                  | 0,01                       | 0,00                  | 0,01                  | 0,079                                | 0,35                        |
| k__Bacteria;p__Bacteroidetes;c__Bacteroidia;o__Bacteroidales;f__Rikenellaceae;g__;s__                                | 6,32                       | 2,92                  | 9,25                  | 5,36                       | 3,67                  | 8,70                  | 0,869                                | 0,94                        |
| k__Bacteria;p__Bacteroidetes;c__Bacteroidia;o__Bacteroidales;f__[Barnesiellaceae];g__;s__                            | 0,47                       | 0,00                  | 2,48                  | 1,93                       | 0,01                  | 3,03                  | 0,094                                | 0,35                        |
| k__Bacteria;p__Firmicutes;c__Clostridia;o__Clostridiales;f__;g__;s__                                                 | 3,25                       | 1,90                  | 5,22                  | 4,21                       | 2,09                  | 7,10                  | 0,285                                | 0,52                        |
| k__Bacteria;p__Firmicutes;c__Clostridia;o__Clostridiales;f__Lachnospiraceae;g__;s__                                  | 8,57                       | 5,52                  | 12,18                 | 7,89                       | 5,54                  | 10,69                 | 0,564                                | 0,72                        |
| k__Bacteria;p__Firmicutes;c__Clostridia;o__Clostridiales;f__Lachnospiraceae;g__Blautia;s__                           | 1,61                       | 1,25                  | 2,25                  | 1,75                       | 0,93                  | 2,58                  | 0,792                                | 0,93                        |
| k__Bacteria;p__Firmicutes;c__Clostridia;o__Clostridiales;f__Lachnospiraceae;g__Coprococcus;s__                       | 0,69                       | 0,39                  | 1,42                  | 0,61                       | 0,39                  | 1,08                  | 0,651                                | 0,80                        |
| k__Bacteria;p__Firmicutes;c__Clostridia;o__Clostridiales;f__Lachnospiraceae;g__Lachnospira;s__                       | 1,24                       | 0,53                  | 2,72                  | 1,69                       | 0,63                  | 3,27                  | 0,345                                | 0,56                        |
| k__Bacteria;p__Firmicutes;c__Clostridia;o__Clostridiales;f__Ruminococcaceae;g__;s__                                  | 8,27                       | 2,68                  | 12,50                 | 9,53                       | 6,55                  | 14,21                 | 0,222                                | 0,45                        |
| k__Bacteria;p__Firmicutes;c__Clostridia;o__Clostridiales;f__Ruminococcaceae;g__Faecalibacterium;s__prausnitzii       | 4,71                       | 2,59                  | 6,47                  | 5,62                       | 3,88                  | 7,88                  | 0,038                                | 0,35                        |
| k__Bacteria;p__Firmicutes;c__Clostridia;o__Clostridiales;f__Ruminococcaceae;g__Oscillospira;s__                      | 0,91                       | 0,73                  | 1,45                  | 1,24                       | 0,89                  | 1,52                  | 0,083                                | 0,35                        |
| k__Bacteria;p__Firmicutes;c__Clostridia;o__Clostridiales;f__Ruminococcaceae;g__Ruminococcus;s__                      | 2,85                       | 0,98                  | 4,89                  | 2,43                       | 0,74                  | 3,92                  | 0,413                                | 0,60                        |
| k__Bacteria;p__Proteobacteria;c__Betaproteobacteria;o__Burkholderiales;f__Alcaligenaceae;g__Sutterella;s__           | 1,37                       | 0,71                  | 2,81                  | 1,02                       | 0,51                  | 1,89                  | 0,106                                | 0,35                        |
